# Supplementary material
Source: publisher figshare collection journal article supplement (https://brill.figshare.com/articles/dataset/_/20227356)
Supplement: Supplementary file 1 [file 1]

**Early Christianity in Athens,  
Attica, and Adjacent Areas**  
*From Paul to Justinian I (1st–6th cent. AD)*

By

Cilliers Breytenbach  
Elli Tzavella

**Figures**

- 1 Location of Attica in Greece and the Aegean (map by E. Tzavella)
- 2 Geomorphological map of Attica (map by E. Tzavella)
- 3 A view of the Mesogeia plain at the area of the Skybti basilica near Spata (cat. A36) (photo by E. Tzavella)
- 4 Mesogeia plain, valley of Brauron with view of the early Christian basilica (cat. A37) (photo by E. Tzavella)
- 5 View of the Marathon bay from the north-east outskirts of Mount Penteli (photo by E. Tzavella)
- 6 Lake of Marathon, view from north-west (photo by E. Tzavella)
- 7 Harbour of Eleusis, etching of 1810 by the Society of Dilettanti, view from south, showing in the background the area of the sanctuary and the acropolis (right) and the medieval tower (left) (reproduced from Ziro, *Η δυτική είσοδος*, pl. 2a, courtesy of Archaeological Society at Athens)
- 8 The peak of Euzonos on Mount Hymettos (photo by E. Tzavella)
- 9 Mount Parnes, gorge near the cave of Pan (photo by E. Tzavella)
- 10 The *civitates* of Attica according to the *Synecdemus* (map by E. Tzavella)
- 11 Oil lamps found in the cave of Pan on Mount Parnes (reproduced from Skias, 'Τὸ παρὰ τὴν Φυλὴν ἄντρον τοῦ Πανός', 16, fig. 9)
- 12 Oil lamps found in the cave of Pan on Mount Parnes (reproduced from Skias, 'Τὸ παρὰ τὴν Φυλὴν ἄντρον τοῦ Πανός', 17, fig. 10)
- 13 The cave of Nympholeptos in Vari, from E. Dodwell, *A Classical and Topographical Tour through Greece, during the Years 1801, 1805, and 1806*, vol. 1 (London, 1819) (Gennadius Library and website 'Travelogues' of the Laskaridis Foundation, <https://eng.travelogues.gr/item.php?view=47076>, with permission of the Laskaridis Foundation)
- 14 *Enkainion* found under the apse of the Asklepieion church (reproduced from Papaeuthymiou, 'Τὸ Ασκληπιεῖο', 86, fig. 3a–c, courtesy of Archaeological Society at Athens)
- 15 The basilica of Alimos, view towards west, the *enkainion* is visible in the apse (photo by H. Wagner, 1929, 'Trachones', courtesy of German Archaeological Institute, copyright © D-DAI-ATT-187)
- 16 Map of Attica with identified early Christian churches (outside Athens): 1 Aigosthena, 2 Eleutherai, 3 Megara, 4 Eleusis, 5 Ano Liosia, 6 Monomati, 7 Patisia, 8 Tavros, 9 Piraeus, 10 Halimous, 11 Evonymon/Trachones, 12 Glyphada, 13 Kaisariani, 14 Kantza, 15 Paiania, 16 Kiapha Thiti, 17 Pikermi, 18 Skybti, 19 Brauron, 20 Porto Raphti, 21 Markopoulo, Dagla, 22 Prospalta/Kalyvia, 23 Trapouria, 24 Lavreotic Olympos, 25 Kamariza, Synterina, 26 Atene/Thymari, 27 Lavrion, 28 Stamata, Amygdaleza, 29 Anoixi, Agia Triada, 30 Marathon, Plasi, 31 Oropos, Skala Oropou (map by E. Tzavella)

- 17 Cist grave with descending steps in Athens, Petmeza Street (reproduced from Lyngouri-Tolia, 'Petmeza Shaft', 122, fig. 4, courtesy of Ephorate of Antiquities of Athens, copyright © Hellenic Ministry of Culture and Sports)
- 18 Cist grave with descending steps in Athens, Petmeza Street (reproduced from Lyngouri-Tolia, 'Petmeza Shaft', 122, fig. 5, courtesy of Ephorate of Antiquities of Athens, copyright © Hellenic Ministry of Culture and Sports)
- 19 Map of Attica (map by A. Städtler) (© Mapbox, © OpenStreetMap)
- 20 ICG 1996: Christian memorial (squeeze © IG/BBAW)
- 21 ICG 1885: *Nomen sacrum* (squeeze © IG/BBAW)
- 22 ICG 2121: Sambatios and Demarche, Christians (squeeze © IG/BBAW)
- 23 ICG 2079: Victorinus, faithful Christian (squeeze © IG/BBAW)
- 24 ICG 1904: Tomb of Zosimiane (squeeze © IG/BBAW)
- 25 ICG 1921: Helladios, butcher (see photo in the printed edition)
- 26 ICG 2038: Bishop Clematius (squeezes © IG/BBAW)
- 27 ICG 2128: Valerius, plumassier (squeezes © IG/BBAW)
- 28 ICG 2092: Isidoros, reader (squeeze © IG/BBAW)
- 29 ICG 2095: Menas and Thomasia (squeeze © IG/BBAW)
- 30 ICG 1853: Christ crucified (✝) for salvation (squeeze © IG/BBAW)
- 31 ICG 1846: Vow of Artemisios and family (squeeze © IG/BBAW)
- 32 ICG 1893: The Lord as light and hope (squeezes © IG/BBAW)
- 33 ICG 2106: Eucharistic symbolism? (squeeze © IG/BBAW)
- 34 ICG 2107: Leptika, God's slave (squeeze © IG/BBAW)
- 35 ICG 1851: For remission and forgiveness of sins (see photo in the printed edition)
- 36 ICG 1897: Invocation (see BCH 120 [1996], 1129 fig. 25,  
[https://cefael.efa.gr/detail.php?site\\_id=1&actionID=page&serie\\_id=BCH&volume\\_number=120&issue\\_number=3&ce=sa6it5l47ehr9otppj59jk6fue2ni5jm&sp=25](https://cefael.efa.gr/detail.php?site_id=1&actionID=page&serie_id=BCH&volume_number=120&issue_number=3&ce=sa6it5l47ehr9otppj59jk6fue2ni5jm&sp=25))
- 37 ICG 4063: *Pater noster* (reproduced from Kern, *Inscriptiones Graecae*, pl. 50)
- 38 ICG 2096: Grave as eternal house (squeeze © IG/BBAW)
- 39 ICG 4150: Amen (squeeze © IG/BBAW)
- 40 ICG 1973: Musonius, ἐπαρχικός (squeeze © IG/BBAW)
- 41 ICG 1930: Hospice of *clarissima* Iuliana (squeeze © IG/BBAW)
- 42 ICG 1891: Trinity (squeezes © IG/BBAW)
- 43 ICG 2103: Tombstone of Euphemia (see BCH 103 [1979], 544 fig. 48–51,  
[https://cefael.efa.gr/detail.php?site\\_id=1&actionID=page&serie\\_id=BCH&volume\\_number=103&issue\\_number=2&ce=sa6it5l47ehr9otppj59jk6fue2ni5jm&sp=89](https://cefael.efa.gr/detail.php?site_id=1&actionID=page&serie_id=BCH&volume_number=103&issue_number=2&ce=sa6it5l47ehr9otppj59jk6fue2ni5jm&sp=89))
- 44 Ground plan of the Parthenon after its conversion to a church (reproduced from Korres, 'Συμβολή', 38, fig. 1, courtesy of Christian Archaeological Society)
- 45 Vaulted grave opened in the north-east corner of the peristyle of the Parthenon (reproduced from Hill, 'Parthenon', 547, fig. 14)
- 46 The Erechtheion in the fourth century AD: ground plan and reconstruction (reproduced from Papanikolaou, *Η αποκατάσταση του Ερεχθείου*, 2.504, fig. 131, courtesy of YSMA, © Hellenic Ministry of Culture and Sports)
- 47 The Erechtheion in the seventh century AD: ground plan and reconstruction (reproduced from Papanikolaou, *Η αποκατάσταση του Ερεχθείου*, 2.505, fig. 133, courtesy of YSMA, © Hellenic Ministry of Culture and Sports)
- 48 The Erechtheion in the beginning of the sixth century AD, ground plan and reconstruction (reproduced from Travlos, *Πολεοδομική εξέλιξις*, 137, fig. 85, courtesy of Archaeological Society at Athens)
- 49 The Erechtheion after its transformation into a Christian church in the seventh century AD, ground plan (reproduced from Travlos, *Athen*, 216, fig. 279, courtesy of Archaeological Society at Athens)

- 50 Interior of the Erechtheion from east, showing the walls of the church (reproduced from Paton, 'Erechtheum', 495, fig. 207, courtesy of American School of Classical Studies at Athens)
- 51 West end of the Erechtheion from south-east, showing remains of inner west wall of the church (reproduced from Paton, 'Erechtheum', 498, fig. 208, courtesy of American School of Classical Studies at Athens)
- 52 Remains of the churches that succeeded the Asklepieion as illustrated by M. Lambert in 1877 (reproduced from Papaeuthymiou, 'Το χριστιανικό Ασκληπιείο', 79, fig. 1, originally in M. Lambert, 'Plan des fouilles faites par la Société Archéologique sur le versant méridional de l'Acropole', *BCH* 1 [1877], 169–170, pl. IV, courtesy of Archaeological Society at Athens)
- 53 Remains of the earliest church (with black colour) that succeeded the Asklepieion (reproduced from Travlos, 'Η παλαιοχριστιανική βασιλική τοῦ Ἀσκληπιείου', 39, fig. 4, courtesy of Archaeological Society at Athens)
- 54 Reconstruction of the ground plan of the earliest church that succeeded the Asklepieion (reproduced from Travlos, 'Η παλαιοχριστιανική βασιλική τοῦ Ἀσκληπιείου', 65, fig. 19, courtesy of Archaeological Society at Athens)
- 55 Reconstruction of the three successive churches that succeeded the Asklepieion (reproduced from Travlos, 'Η παλαιοχριστιανική βασιλική τοῦ Ἀσκληπιείου', 67, fig. 20, courtesy of Archaeological Society at Athens)
- 56 Bronze lamp found in the vicinity of the Asklepieion basilica (reproduced from Papaeuthymiou, 'Το Ασκληπιείο', 86, fig. 3a–c, courtesy of Archaeological Society at Athens)
- 57 Basilica at the theatre of Dionysus, reconstruction of ground plan (reproduced from Travlos, 'Η παλαιοχριστιανική βασιλική τοῦ Διονυσιακοῦ θεάτρου', 303, fig. 2, courtesy of Archaeological Society at Athens)
- 58 Lamps contained in graves excavated in the Odeion of Perikles (reproduced from Orlandos, 'Ἀνασκαφαὶ ἐν τῷ Ὡιδεῖω τοῦ Περικλέους', 28, figs. 3–4, courtesy of Archaeological Society at Athens)
- 59 Lamps contained in graves excavated in the Odeion of Perikles (reproduced from Orlandos, 'Ἀνασκαφαὶ ἐν τῷ Ὡιδεῖω τοῦ Περικλέους', 29, fig. 5, courtesy of Archaeological Society at Athens)
- 60 Lamps contained in graves excavated in the Odeion of Perikles (reproduced from Orlandos, 'Ἀνασκαφαὶ ἐν τῷ Ὡιδεῖω τοῦ Περικλέους', 30, fig. 6, courtesy of Archaeological Society at Athens)
- 61 Lamps contained in graves excavated in the Odeion of Perikles (reproduced from Orlandos, 'Ἀνασκαφαὶ ἐν τῷ Ὡιδεῖω τοῦ Περικλέους', 30, fig. 7, courtesy of Archaeological Society at Athens)
- 62 Tetraconch building in the Forum of Hadrian, ground plan (reproduced from Travlos, *Athen*, 50, fig. 49, courtesy of Archaeological Society at Athens)
- 63 Tetraconch building in the Forum of Hadrian, reconstruction (reproduced from Travlos, *Athen*, 51, figs. 50–51, courtesy of Archaeological Society at Athens)
- 64 The Hephaisteion as a church, ground plan (reproduced from Dinsmoor, *Hephaisteion*, 5, fig. 1, courtesy of American School of Classical Studies at Athens)
- 65 The Hephaisteion as a church, view from east (G.-A. Blouet, 'Athènes: Temple de Thésée', in *Expédition scientifique de la Morée*, vol. 3 [Paris, 1838], pl. 92; Library of Laskarides Foundation/Travelogues, courtesy of Laskarides Foundation)
- 66 Agios Thomas church, ground plan showing all phases (reproduced from Chatzedakes, 'Βυζαντινά και μεσαιωνικά μνημεία', 185, fig. 2, courtesy of Archaeological Resources Fund)
- 67 Agios Thomas church, ground plan showing all phases (reproduced from Chatzedakes, 'Βυζαντινά και μεσαιωνικά μνημεία', 187, fig. 4, courtesy of Archaeological Resources Fund)

- 68 Agios Thomas church, ground plan showing all phases (reproduced from Chatzedakes, 'Βυζαντινά και μεσαιωνικά μνημεία', 188, fig. 5, courtesy of Archaeological Resources Fund/Hellenic Ministry of Culture and Sports)
- 69 Olympieion basilica, ground plan (reproduced from Travlos, 'Ολυμπιεῖον', 39, fig. 11, courtesy of Archaeological Society at Athens)
- 70 Ilissos basilica, ground plan (reproduced from Soteriou, 'Παλαιά χριστιανική βασιλική Ἰλισοῦ', 3, fig. 3, courtesy of Archaeological Society at Athens)
- 71 Ilissos basilica, crypt, section and ground plan (reproduced from: Soteriou, 'Παλαιά χριστιανική βασιλική Ἰλισοῦ', 9, fig. 8, courtesy of Archaeological Society at Athens)
- 72 Ilissos basilica, vaulted graves (reproduced from Soteriou, 'Παλαιά χριστιανική βασιλική Ἰλισοῦ', 28, fig. 29, courtesy of Archaeological Society at Athens)
- 73 Ilissos basilica, cist grave (reproduced from Soteriou, 'Παλαιά χριστιανική βασιλική Ἰλισοῦ', 28, fig. 30, courtesy of Archaeological Society at Athens)
- 74 Ilissos basilica, cist grave (same as in fig. 73), section (reproduced from Soteriou, 'Παλαιά χριστιανική βασιλική Ἰλισοῦ', 29, fig. 31, courtesy of Archaeological Society at Athens)
- 75 Church known as Panagia stin Petra and cemetery, ground plan (reproduced from Skias, 'Ἀνασκαφαὶ παρὰ τὸν Ἰλισὸν', pl. A)
- 76 Unknown early Christian church at Athens, possibly in the National Garden, drawn by A. Lenoir (reproduced from Soteriou, 'Παλαιά χριστιανική βασιλική Ἰλισοῦ', 5, fig. 5)
- 77 Ano Liosia, Tsouklidi, building, ground plan (reproduced from Platonos-Yiota, 'Ἄνω Λιόσια', 117, fig. 36, courtesy of Archaeological Resource Fund/Hellenic Ministry of Culture and Sports)
- 78 Ano Liosia, Tsouklidi, east wall of building, view from south-west (reproduced from Platonos-Yiota, 'Ἄνω Λιόσια', 117, fig. 37, courtesy of Archaeological Resources Fund/Hellenic Ministry of Culture and Sports)
- 79 Ano Liosia, Tsouklidi, graves (reproduced from Platonos-Yiota, 'Ἄνω Λιόσια', 118, fig. 39, courtesy of Archaeological Resource Fund/Hellenic Ministry of Culture and Sports)
- 80 Ano Liosia, Tsouklidi, detail of grave (reproduced from Platonos-Yiota, 'Ἄνω Λιόσια', 118, fig. 40, courtesy of Archaeological Resources Fund/Hellenic Ministry of Culture and Sports)
- 81 The basilica of Halimous, showing successive construction phases (early Christian phase: dark grey) (reproduced from Orlandos, *Μεσαιωνικά μνημεία*, 156, fig. 203)
- 82 The basilica of Halimous, showing early Christian phase (reproduced from Travlos, *Attika*, 14, fig. 19, courtesy of Archaeological Society at Athens)
- 83 The basilica at Skybti (Spata), ground plan (reproduced from Travlos, *Attika*, 339, fig. 426, courtesy of Archaeological Society at Athens)
- 84 The basilica at Skybti (Spata), view of apse from north (photo by E. Tzavella, courtesy of the Ephorate of Antiquities of Eastern Attica/Hellenic Ministry of Culture and Sports)
- 85 The basilica at Brauron, view from north-west (photo by E. Tzavella, courtesy of the Ephorate of Antiquities of Eastern Attica/Hellenic Ministry of Culture and Sports)
- 86 Basilica at Paiania lying beneath the standing church of Agios Athanasios, ground plan (reproduced from Gini-Tsophopoulou, 'Νομός Ἀττικῆς: Μεσόγεια', 107, fig. 11, courtesy of Archaeological Resources Fund/Hellenic Ministry of Culture and Sports)
- 87 Basilica at Paiania lying beneath the standing church of Agios Athanasios, view from south (photo by E. Tzavella, courtesy of the Ephorate of Antiquities of Eastern Attica/Hellenic Ministry of Culture and Sports)
- 88 Basilica at Markopoulo, Dagla, ground plan showing successive phases (early Christian: white with bold contours) (reproduced from Lazarides, 'Μεσαιωνικά Αθηνών' [1960], 70, fig. 1, courtesy of Archaeological Resources Fund/Hellenic Ministry of Culture and Sports)

- 89 Basilica at Porto Raphti, ground plan (reproduced from Travlos, *Attika*, 376, fig. 471, courtesy of Archaeological Society at Athens)
- 90 Basilica at Porto Raphti, view from south (reproduced from Travlos, *Attika*, 377, fig. 472, courtesy of Archaeological Society at Athens)
- 91 Basilica and cemetery at Porto Raphti, aerial view (reproduced from Gini-Tsophopoulou, 'Τα Μεσόγεια', 198, fig. 7, courtesy of the Ephorate of Antiquities of Eastern Attica/Hellenic Ministry of Culture and Sports)
- 92 Basilica of Agios Georgios at Kalyvia, view from east (photo by E. Tzavella, courtesy of the Ephorate of Antiquities of Eastern Attica/Hellenic Ministry of Culture and Sports)
- 93 Basilica of Taxiarches at Kalyvia, ground plan (reproduced from Orlandos, 'Συμπληρωματικά', 443, fig. 5)
- 94 Basilica of Taxiarches at Kalyvia, view from south (photo by E. Tzavella, courtesy of the Ephorate of Antiquities of Eastern Attica/Hellenic Ministry of Culture and Sports)
- 95 Basilica at Stamata, ground plan (reproduced from Gini-Tsophopoulou, 'Νομός Αττικής', 72, fig. 2, courtesy of Archaeological Resources Fund/Hellenic Ministry of Culture and Sports)
- 96 Basilica at Kiapha Thiti within its surroundings, site plan (reproduced from Hagel and Lauter, *Kiapha-Thiti*, Gesamtbeilage 7, copyright © Marburger Winckelmann-Programm 1989)
- 97 Basilica at Kiapha Thiti, ground plan (reproduced from Hagel and Lauter, *Kiapha-Thiti*, fig. 8, copyright © Marburger Winckelmann-Programm 1989)
- 98 Basilica at Agia Marina, Marathon, view of central aisle (reproduced from Mela, 'Μαραθώνας', 57, pl. 22b, courtesy of Archaeological Resources Fund/Hellenic Ministry of Culture and Sports)
- 99 Map of Marathon showing the location of medieval monuments (reproduced from Lolling, 'Topographie von Marathon', pl. 1)
- 100 Eleutherai, site plan (reproduced from Travlos, *Attika*, 172, fig. 216, courtesy of Archaeological Society at Athens)
- 101 Eleutherai, basilicas, ground plan (reproduced from Travlos, *Attika*, 176, fig. 224, courtesy of Archaeological Society at Athens)
- 102 Eleutherai, basilica A, ground plan (reproduced from Knodell, Fachard, and Papangeli, '2016 Mazi Archaeological Project', 158, fig. 11, courtesy of Mazi Archaeological Project)
- 103 Eleusis, basilica lying beneath the church of Agios Zacharias, ground plan (reproduced from Travlos, *Attika*, 169, fig. 213, courtesy of Archaeological Society at Athens)
- 104 Eleusis, basilica lying beneath the church of Agios Zacharias, baptistery (reproduced from Travlos, *Attika*, 169, fig. 214, courtesy of Archaeological Society at Athens)
- 105 Mosaic floor from the Lavrion basilica, stored in the Lavrion Museum (photo by E. Tzavella, courtesy of the Ephorate of Antiquities of Eastern Attica/Hellenic Ministry of Culture and Sports)
- 106 Basilica at Lavreotic Olympos, ground plan (reproduced from Travlos, *Attika*, 22, fig. 28, courtesy of Archaeological Society at Athens)
- 107 Basilica at Lavreotic Olympos, oil press in an annex room (photo by E. Tzavella, courtesy of the Ephorate of Antiquities of Eastern Attica/Hellenic Ministry of Culture and Sports)
- 108 Church at Trapouria, view of apse from north (photo by E. Tzavella, courtesy of the Ephorate of Antiquities of Eastern Attica/Hellenic Ministry of Culture and Sports)
- 109 Church at Pousipelia (Synterina), view from west (photo by E. Tzavella, courtesy of the Ephorate of Antiquities of Eastern Attica/Hellenic Ministry of Culture and Sports)
- 110 Church at Thymari (TH 16), ground plan (reproduced from Lohmann, 'Kirche TH 16', 178, fig. 9, copyright © Prof. Hans Lohmann)
- 111 Church at Thymari (TH 16), view from north (reproduced from Lohmann, 'Kirche TH 16', 175, fig. 6, copyright © Prof. Hans Lohmann)

- 112 Church at Thymari (TH 34), view from west (reproduced from Lohmann, *Atene*, pl. 136:4, copyright © Prof. Hans Lohmann)
- 113 Church of the Four Martyrs, Megara, remains of early Christian apse (reproduced from Gioles, 'Οι Δέκα Ἅγιοι Μάρτυρες', 94–96, fig. 8, copyright © Christian Archaeological Society)
- 114 Inscribed reliquary stone plaque, church of the Four Martyrs, Megara (reproduced from Gioles, 'Οι Δέκα Ἅγιοι Μάρτυρες', 96, fig. 10, copyright © Christian Archaeological Society)
- 115 Basilica at Aigosthena, ground plan (reproduced from Orlandos, 'Ἀνασκαφή τῆς βασιλικῆς τῶν Αἰγοσθένων', 130, fig. 2)
- 116 Basilica at Vardia, Aigina, ground plan (reproduced from Lazarides, 'Βυζαντινά καὶ μεσαιωνικά μνημεῖα' [1967], 162, fig. 2, courtesy of Archaeological Resources Fund/Hellenic Ministry of Culture and Sports)
- 117 Map of Athens showing early Christian churches and cemeteries in relation to the Valerianic city wall (map by E. Tzavella)
- 118 Excavation at 30 Vourvachi and 10 Theophilopoulou Streets, Kynosarges cemetery, ground plan (reproduced from Alexandri, 'Τ' Εφορεία' [1972], 98, fig. 9, courtesy of Archaeological Resources Fund/Hellenic Ministry of Culture and Sports)
- 119 Building at Petmeza Street (reproduced from Lyngouri-Tolia, 'Petmeza Shaft', 121, fig. 2, courtesy of Ephorate of Antiquities of Athens, copyright © Hellenic Ministry of Culture and Sports)
- 120 Oropos, cemetery at Nea Palatia (reproduced from Agallopoulou, 'Ὠρωπός' [1997], 98, fig. 10, courtesy of Archaeological Resources Fund/Hellenic Ministry of Culture and Sports)
